# Supplementary material
Source: PubMed Central journal article supplement (PMC4120702)
Supplement: NIHMS594225-supplement-01.pdf [file NIHMS594225-supplement-01.pdf]

Partial Correlations of LOF subscales and Self Report Measures

Table 1. Controlling for MCCB

|                                    | LOF Total | LOF Work | LOF Social |
|------------------------------------|-----------|----------|------------|
| Defeatist Performance Beliefs      | -.328**   | -.154    | -.304**    |
| Physical & Social Anhedonia Scales |           |          |            |
| Physical Anhedonia                 | -.287**   | -.138    | -.329**    |
| Social Anhedonia                   | -.437**   | -.119    | -.526**    |
| PANAS                              |           |          |            |
| Positive Affect                    | .169      | .070     | .190       |
| Negative Affect                    | -.356**   | -.356**  | -.256*     |
| BIS/BAS                            |           |          |            |
| BIS subscale                       | -.253*    | -.166    | -.275*     |
| BAS subscale                       | .030      | .054     | .010       |

Table 3. Controlling for SANS Affective Blunting and Alogia

|                                    | LOF Total | LOF Work | LOF Social |
|------------------------------------|-----------|----------|------------|
| Defeatist Performance Beliefs      | -.218*    | -.058    | -.228*     |
| Physical & Social Anhedonia Scales |           |          |            |
| Physical Anhedonia                 | -.306**   | -.187    | -.286**    |
| Social Anhedonia                   | -.414**   | -.173    | -.498**    |
| PANAS                              |           |          |            |
| Positive Affect                    | .180      | .101     | .163       |
| Negative Affect                    | -.360**   | -.355**  | -.232*     |
| BIS/BAS                            |           |          |            |
| BIS subscale                       | -.263**   | -.158    | -.282**    |
| BAS subscale                       | .079      | .065     | .062       |

Table 5. Controlling for SANS Anhedonia Asociality

|                                    | LOF Total | LOF Work | LOF Social |
|------------------------------------|-----------|----------|------------|
| Defeatist Performance Beliefs      | -.109     | .022     | -.066      |
| Physical & Social Anhedonia Scales |           |          |            |
| Physical Anhedonia                 | -.080     | -.036    | -.036      |
| Social Anhedonia                   | -.134     | .038     | -.262**    |
| PANAS                              |           |          |            |
| Positive Affect                    | .087      | .032     | .052       |
| Negative Affect                    | -.312**   | -.304**  | -.129      |
| BIS/BAS                            |           |          |            |
| BIS subscale                       | -.056     | -.017    | -.100      |
| BAS subscale                       | .001      | .010     | .019       |

\* p < 0.05; \*\*p < 0.01

Table 2. Controlling for MCCB and Defeatist Beliefs

|                                    | LOF Total | LOF Work | LOF Social |
|------------------------------------|-----------|----------|------------|
| Physical & Social Anhedonia Scales |           |          |            |
| Physical Anhedonia                 | -.0236*   | -.109    | -.285**    |
| Social Anhedonia                   | -.414**   | -.179    | -.509**    |
| PANAS                              |           |          |            |
| Positive Affect                    | 0.162     | .063     | .184       |
| Negative Affect                    | -.345**   | -.347**  | -.239*     |
| BIS/BAS                            |           |          |            |
| BIS subscale                       | -.210*    | -0.144   | -.237*     |
| BAS subscale                       | .088      | .080     | .061       |

Table 4. Controlling for BPRS Total Score

|                                    | LOF Total | LOF Work | LOF Social |
|------------------------------------|-----------|----------|------------|
| Defeatist Performance Beliefs      | -.258**   | -.090    | -.249*     |
| Physical & Social Anhedonia Scales |           |          |            |
| Physical Anhedonia                 | -.242*    | -.142    | -.243*     |
| Social Anhedonia                   | -.299**   | -.083    | -.442**    |
| PANAS                              |           |          |            |
| Positive Affect                    | .073      | .027     | .092       |
| Negative Affect                    | -.222*    | -.270**  | -.137      |
| BIS/BAS                            |           |          |            |
| BIS subscale                       | -.145     | -.076    | -.207*     |
| BAS subscale                       | .013      | .000     | .003       |

Table 6. Controlling for BPRS - Anxiety Depression

|                                    | LOF Total | LOF Work | LOF Social |
|------------------------------------|-----------|----------|------------|
| Defeatist Performance Beliefs      | -.320**   | -.151    | -.297**    |
| Physical & Social Anhedonia Scales |           |          |            |
| Physical Anhedonia                 | -.326**   | -.213*   | -0.304**   |
| Social Anhedonia                   | -.428**   | -.199*   | -.512**    |
| PANAS                              |           |          |            |
| Positive Affect                    | .181      | .107     | .164       |
| Negative Affect                    | -.342**   | -.352**  | -.225*     |
| BIS/BAS                            |           |          |            |
| BIS subscale                       | .208*     | -.122    | -.248*     |
| BAS subscale                       | .000      | .009     | .011       |

**Table 7. Correlations of clinician ratings and self-report questionnaires**

|                                               | <b>Blunting<br/>and Alogia</b> | <b>Avolition</b> | <b>Anhedonia/<br/>Asociality</b> | <b>BPRS Total</b> | <b>BPRS Anxiety<br/>Depression</b> | <b>BPRS Positive<br/>Symptoms</b> |
|-----------------------------------------------|--------------------------------|------------------|----------------------------------|-------------------|------------------------------------|-----------------------------------|
| <b>Defeatist Performance Beliefs</b>          | .317**                         | -.145            | .344**                           | .223*             | .077                               | .153                              |
| <b>Physical &amp; Social Anhedonia Scales</b> |                                |                  |                                  |                   |                                    |                                   |
| <b>Physical Anhedonia</b>                     | .152                           | -.081            | .385**                           | .285*             | 0.130                              | 0.187                             |
| <b>Social Anhedonia</b>                       | .189                           | .141             | .492**                           | .451**            | .276**                             | .256*                             |
| <b>PANAS</b>                                  |                                |                  |                                  |                   |                                    |                                   |
| <b>Positive Affect</b>                        | -.105                          | -.175            | -.201*                           | -.309**           | -.215*                             | -.110                             |
| <b>Negative Affect</b>                        | .113                           | -.196            | .226*                            | .403**            | .365**                             | .286**                            |
| <b>BIS/BAS</b>                                |                                |                  |                                  |                   |                                    |                                   |
| <b>BIS subscale</b>                           | .025                           | .099             | .279**                           | .257**            | .354**                             | .180                              |
| <b>BAS subscale</b>                           | .158                           | .083             | .003                             | -.021             | .012                               | -.091                             |

\* p &lt; 0.05; \*\*p &lt; 0.01
